# Supplementary material for: Phytochemical Constituents and Antimicrobial Activity of Euphorbia serrata L. Extracts for Borago officinalis L. Crop Protection
Source: MDPI journal article supplement (doi:10.3390/horticulturae9060652), 2023-06-01
Supplement: s1 [file s1]

# Phytochemical Constituents and Antimicrobial Activity of *Euphorbia serrata* L. Extracts for *Borago officinalis* L. Crop Protection

Eva Sánchez-Hernández, Vicente González-García, Ana Palacio-Bielsa, José Casanova-Gascón, Luis Manuel Navas-Gracia, Jesús Martín-Gil, and Pablo Martín-Ramos

## SUPPORTING INFORMATION

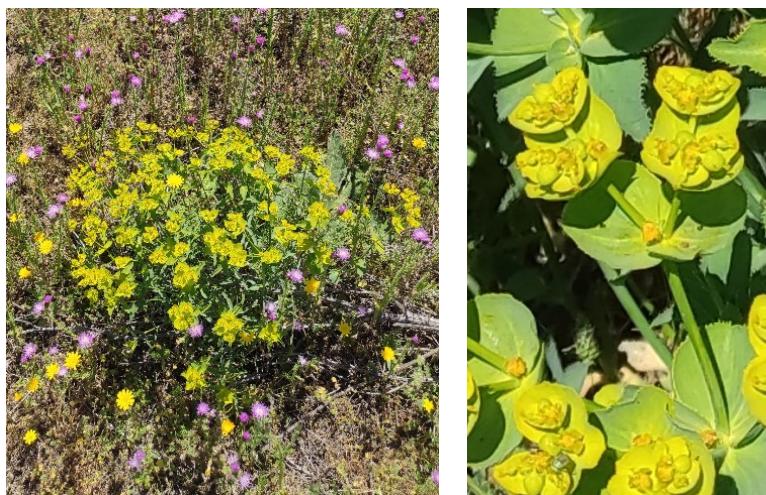

**Figure S1.** *Euphorbia serrata* aerial part (**left**) and detail of the inflorescences (cyathia) (**right**).

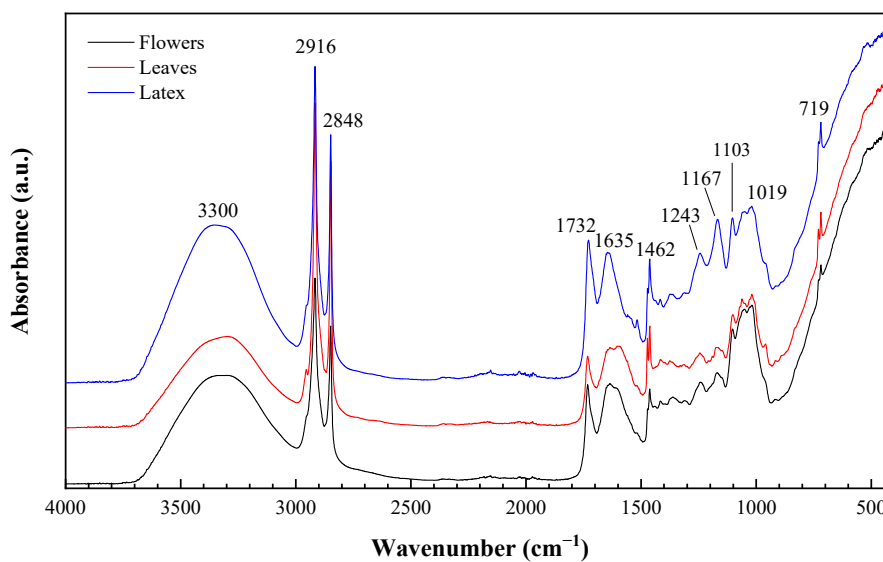

**Figure S2.** Infrared spectra of *E. serrata* flowers, leaves, and latex.

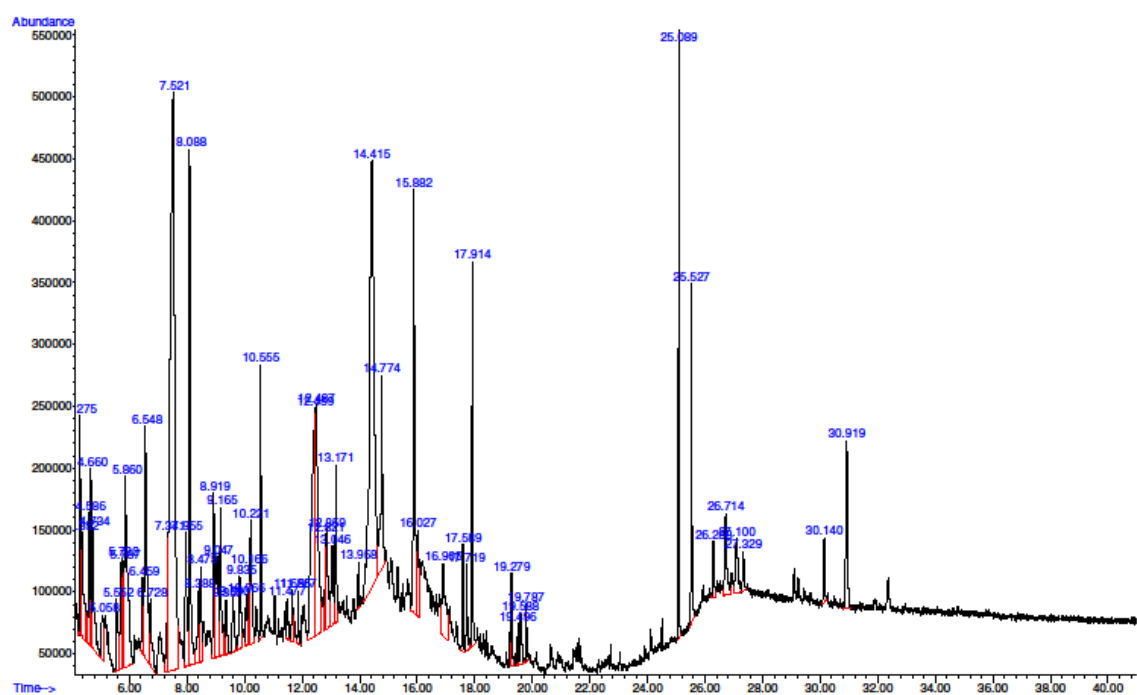

Figure S3. GC-MS chromatogram of *E. serrata* aerial parts hydromethanolic extract.

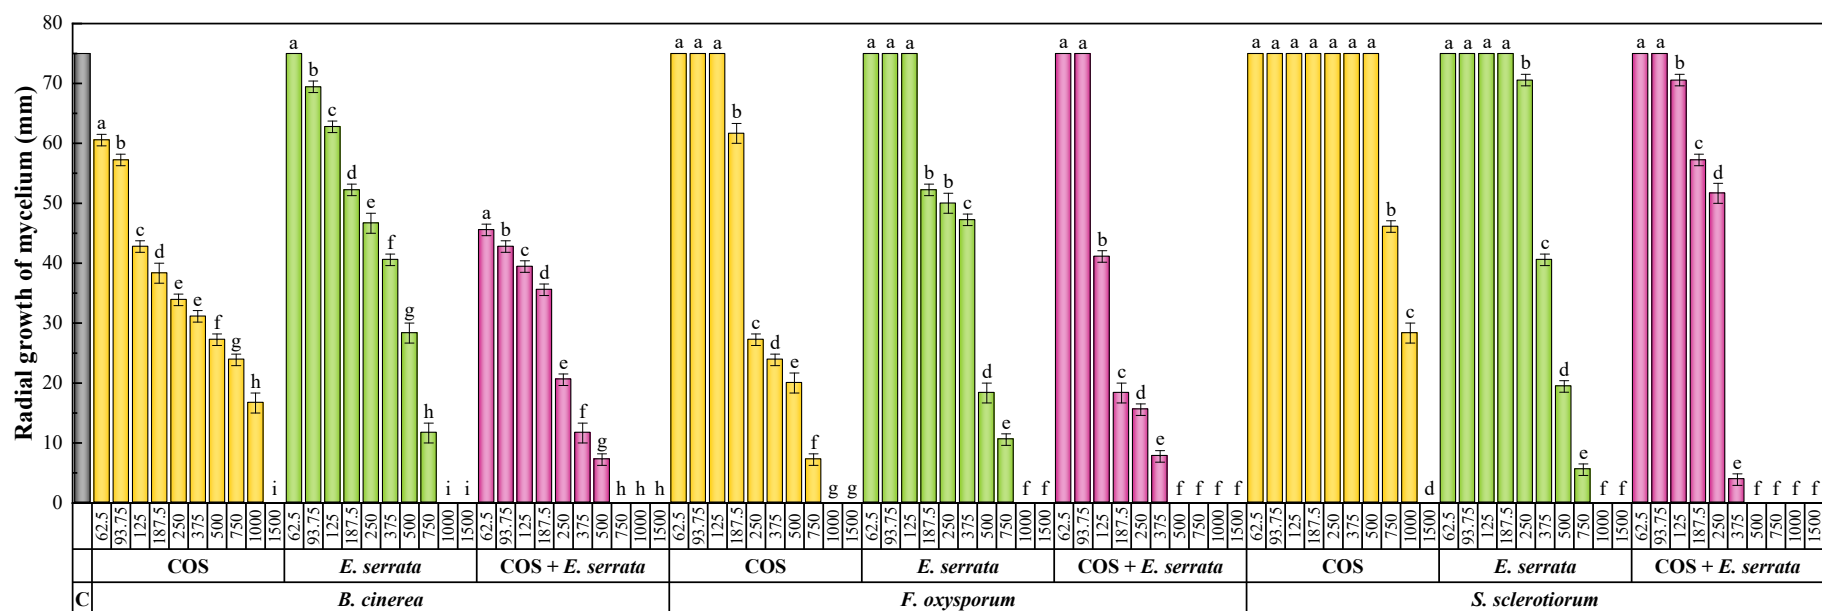

**Figure S4.** Inhibition of the radial growth of the mycelium of *B. cinerea*, *F. oxysporum*, and *S. sclerotiorum* in the *in vitro* tests performed with PDA medium amended with different concentrations (in the range of 62.5–1500 µg·mL<sup>-1</sup>) of chitosan oligomers (COS), *E. serrata* aerial part extract, and their conjugate complex (COS–*E. serrata*). The grey bar (C) represents the controls. The efficacies of concentrations labeled with the same letters are not statistically different at  $p < 0.05$ . Standard deviations are represented by error bars.

**Table S1.** Efficacy of plant extracts and essential oils reported in the literature against the phytopathogens under study.

| Pathogen           | Extraction Media                                                                     | Plant                                           | Efficacy                                         | Ref. |
|--------------------|--------------------------------------------------------------------------------------|-------------------------------------------------|--------------------------------------------------|------|
| <i>P. cichorii</i> | Methanol/water                                                                       | <i>Ginkgo biloba</i> PE                         | MIC = 750 $\mu\text{g}\cdot\text{mL}^{-1}$       | [1]  |
|                    | Methanol                                                                             | <i>Musa paradisiaca</i> PE                      | n.a., at 3% of extract                           | [2]  |
|                    | Acetone                                                                              | <i>Withania somnifera</i> PE                    | IZ > 90 mm, at 2–3% of extract                   | [3]  |
|                    | Water, ethanol (95%), ethanol/water, acetone, or methanol                            | <i>Abies balsamea</i> PE                        | n.a.                                             | [4]  |
|                    |                                                                                      | <i>Acer rubrum</i> PE                           | n.a.                                             |      |
|                    |                                                                                      | <i>Acer saccharum</i> PE                        | IZ = n.a.→ 10 mm                                 |      |
|                    |                                                                                      | <i>Alnus incana</i> subsp. <i>rugosa</i> PE     | n.a.                                             |      |
|                    |                                                                                      | <i>Larix laricina</i> PE                        | n.a.                                             |      |
|                    |                                                                                      | <i>Picea glauca</i> PE                          | n.a.                                             |      |
|                    |                                                                                      | <i>Picea mariana</i> PE                         | n.a.                                             |      |
|                    |                                                                                      | <i>Pinus banksiana</i> PE                       | n.a.                                             |      |
|                    |                                                                                      | <i>Pinus strobus</i> PE                         | n.a.                                             |      |
|                    |                                                                                      | <i>Populus tremuloides</i> PE                   | n.a.                                             |      |
|                    |                                                                                      | <i>Prunus avium</i> PE                          | n.a.                                             |      |
|                    |                                                                                      | <i>Quercus rubra</i> PE                         | IZ = 5–10 mm                                     |      |
|                    | Methanol                                                                             | <i>Leandra cornoides</i> PE                     | MIC > 1200 $\mu\text{g}\cdot\text{mL}^{-1}$      | [5]  |
|                    | Methanol/water                                                                       | <i>Silene uniflora</i> PE                       | MIC = 1000 $\mu\text{g}\cdot\text{mL}^{-1}$      | [6]  |
|                    |                                                                                      | COS– <i>S. uniflora</i> PE                      | MIC = 750 $\mu\text{g}\cdot\text{mL}^{-1}$       |      |
| <i>B. cinerea</i>  | Aqueous ammonia                                                                      | <i>Uncaria tomentosa</i> PE                     | MIC = 375 $\mu\text{g}\cdot\text{mL}^{-1}$       | [7]  |
|                    |                                                                                      | COS– <i>U. tomentosa</i> PE                     | MIC = 93.75 $\mu\text{g}\cdot\text{mL}^{-1}$     |      |
|                    | Natural eutectic solvent (1500 $\mu\text{g}\cdot\text{mL}^{-1}$ )                    | <i>Larrea cuneifolia</i> PE                     | IR = 92%                                         | [8]  |
|                    | Hexane, dichloromethane, methanol, water (500,000 $\mu\text{g}\cdot\text{mL}^{-1}$ ) | <i>Vernonia amygdalina</i> PE                   | IR = 75.7%                                       | [9]  |
|                    | CO <sub>2</sub> extraction                                                           | <i>Glechoma hederacea</i> var. <i>longituba</i> | MIC $\geq$ 5000 $\mu\text{g}\cdot\text{mL}^{-1}$ | [10] |
|                    | CO <sub>2</sub> extraction                                                           | <i>Pimenta dioica</i> PE                        | MIC = 2200 $\mu\text{g}\cdot\text{mL}^{-1}$      | [11] |
|                    |                                                                                      | <i>Cinnamomum cassia</i> PE                     | MIC = 600 $\mu\text{g}\cdot\text{mL}^{-1}$       |      |
|                    |                                                                                      | <i>Laurus nobilis</i> PE                        | MIC = 3000 $\mu\text{g}\cdot\text{mL}^{-1}$      |      |
|                    | CO <sub>2</sub> extraction                                                           | <i>Syzygium aromaticum</i> PE                   | MIC = 600 $\mu\text{g}\cdot\text{mL}^{-1}$       | [12] |
|                    |                                                                                      | <i>S. aromaticum</i> EO                         | MIC = 1200 $\mu\text{g}\cdot\text{mL}^{-1}$      |      |
|                    |                                                                                      | <i>L. nobilis</i> PE                            | MIC > 2000 $\mu\text{g}\cdot\text{mL}^{-1}$      |      |
|                    |                                                                                      | <i>L. nobilis</i> EO                            | MIC > 2000 $\mu\text{g}\cdot\text{mL}^{-1}$      |      |
|                    |                                                                                      | <i>Rosmarinus officinalis</i> PE                | MIC > 2000 $\mu\text{g}\cdot\text{mL}^{-1}$      |      |
|                    |                                                                                      | <i>R. officinalis</i> EO                        | MIC > 2000 $\mu\text{g}\cdot\text{mL}^{-1}$      |      |

| Pathogen                 | Extraction Media       | Plant                              | Efficacy                                       | Ref. |
|--------------------------|------------------------|------------------------------------|------------------------------------------------|------|
| <i>F. oxysporum</i> spp. | Water                  | <i>Anabaena</i> sp. PE             | MIC = 2500 $\mu\text{g}\cdot\text{mL}^{-1}$    | [13] |
|                          |                        | <i>Ecklonia</i> sp. PE             | MIC = 5000 $\mu\text{g}\cdot\text{mL}^{-1}$    |      |
|                          |                        | <i>Jania</i> sp. PE                | MIC = 10,000 $\mu\text{g}\cdot\text{mL}^{-1}$  |      |
|                          | Ethanol/water          | <i>Achillea millefolium</i> PE     | MIC > 20,000 $\mu\text{g}\cdot\text{mL}^{-1}$  | [14] |
|                          |                        | <i>Allium sativum</i> PE           | MIC = 20,000 $\mu\text{g}\cdot\text{mL}^{-1}$  |      |
|                          |                        | <i>Artemisia dracunculus</i> PE    | MIC > 20,000 $\mu\text{g}\cdot\text{mL}^{-1}$  |      |
|                          |                        | <i>Hyssopus officinalis</i> PE     | MIC > 5000 $\mu\text{g}\cdot\text{mL}^{-1}$    |      |
|                          |                        | <i>Mentha</i> sp. PE               | MIC = 20,000 $\mu\text{g}\cdot\text{mL}^{-1}$  |      |
|                          |                        | <i>R. officinalis</i> PE           | MIC > 20,000 $\mu\text{g}\cdot\text{mL}^{-1}$  |      |
|                          |                        | <i>Satureja hortensis</i> PE       | MIC = 10,000 $\mu\text{g}\cdot\text{mL}^{-1}$  |      |
|                          |                        | <i>Tagetes patula</i> PE           | MIC > 20,000 $\mu\text{g}\cdot\text{mL}^{-1}$  |      |
|                          |                        | <i>Valeriana officinalis</i> PE    | MIC > 20,000 $\mu\text{g}\cdot\text{mL}^{-1}$  |      |
|                          | Methanol               | <i>Micromeria nervosa</i> PE       | MIC = 0.5%                                     | [15] |
|                          |                        | <i>Origanum syriacum</i> PE        | MIC = 0.06%                                    |      |
|                          |                        | <i>Inula viscosa</i> PE            | MIC > 2%                                       |      |
|                          |                        | <i>Plumbago maritima</i> PE        | MIC = 1% <sup>6</sup>                          |      |
|                          | Water                  | <i>O. heracleoticum</i> PE         | MIC > 500,000 $\mu\text{g}\cdot\text{mL}^{-1}$ | [16] |
|                          |                        | <i>Salvia officinalis</i> PE       | MIC > 500,000 $\mu\text{g}\cdot\text{mL}^{-1}$ |      |
|                          |                        | <i>R. officinalis</i> PE           | MIC > 500,000 $\mu\text{g}\cdot\text{mL}^{-1}$ |      |
|                          | Ethanol                | <i>Pinus sylvestris</i> bark       | MIC = 20,000 $\mu\text{g}\cdot\text{mL}^{-1}$  | [17] |
|                          |                        | <i>P. abies</i> bark               | MIC = 20,000 $\mu\text{g}\cdot\text{mL}^{-1}$  |      |
|                          | Methanol               | <i>Liquidambar orientalis</i> PE   | MIC > 400,000 $\mu\text{g}\cdot\text{mL}^{-1}$ | [18] |
|                          |                        | <i>Myrtus communis</i> PE          | MIC = 400,000 $\mu\text{g}\cdot\text{mL}^{-1}$ |      |
|                          | Methanol/water         | <i>Armeria maritima</i> PE         | MIC = 750 $\mu\text{g}\cdot\text{mL}^{-1}$     | [19] |
|                          |                        | COS– <i>A. maritima</i> PE         | MIC = 500 $\mu\text{g}\cdot\text{mL}^{-1}$     |      |
|                          | Ethanol                | <i>Annona cherimola</i> PE         | MIC = 16,000 $\mu\text{g}\cdot\text{mL}^{-1}$  | [20] |
|                          | Water (5, 10, and 20%) | <i>Azadirachta indica</i> PE       | n.a.                                           | [21] |
|                          |                        | <i>Parthenium hysterophorus</i> PE | IR = 2.6–15.9%                                 |      |
|                          |                        | <i>Momordica charantia</i> PE      | IR = 14.4–24.4%                                |      |
|                          |                        | <i>A. sativum</i> PE               | IR = 52.6–63.3%                                |      |
|                          |                        | <i>Eucalyptus globulus</i> PE      | IR = 34.3–61.8%                                |      |
|                          |                        | <i>Calotropis procera</i> PEs      | n.a.                                           |      |
|                          |                        | <i>Aloe vera</i> PE                | IR = 16.6%                                     |      |
|                          |                        | <i>Beta vulgaris</i> PE            | IR = 6.3–10.3%                                 |      |

| Pathogen | Extraction Media               | Plant                             | Efficacy                                                       | Ref. |
|----------|--------------------------------|-----------------------------------|----------------------------------------------------------------|------|
|          |                                | <i>D. stramonium</i> PE           | IR = 61.1%                                                     | [22] |
|          |                                | Water (1%)                        | IR = 78%                                                       |      |
|          |                                | Propanol(1%)                      | IR = 62%                                                       |      |
|          |                                | Hexane                            | MIC = 1000 $\mu\text{g}\cdot\text{mL}^{-1}$                    | [23] |
|          |                                | Chloroform                        | MIC = 1000 $\mu\text{g}\cdot\text{mL}^{-1}$                    |      |
|          |                                | Ethyl acetate                     | MIC = 500 $\mu\text{g}\cdot\text{mL}^{-1}$                     |      |
|          |                                | Methanol                          | MIC = 500 $\mu\text{g}\cdot\text{mL}^{-1}$                     |      |
|          | Crude extract (5, 10, and 20%) | <i>A. indica</i> PE               | IR = 24.1–62.0%                                                | [24] |
|          |                                | <i>Ocimum sanctum</i> PE          | IR = 7.0–17.0%                                                 |      |
|          |                                | <i>Datura metel</i> PE            | IR = 10.1–34.2%                                                |      |
|          |                                | <i>Cassia alata</i> PE            | IR = 46.8–74.7%                                                |      |
|          |                                | <i>Asparagus racemosus</i> PE     | IR = 44.3–57.0%                                                |      |
|          |                                | <i>A. sativum</i> PE              | IR = 17.6–34.2%                                                |      |
|          |                                | <i>Zingiber officinale</i> PE     | IR = 23.7–39.5%                                                |      |
|          | Ethanol                        | <i>Flourensia microphylla</i> PE  | MIC = 1500 $\mu\text{L}\cdot\text{L}^{-1}$                     | [25] |
|          |                                | <i>Flourensia cernua</i> PE       | MIC = 1500 $\mu\text{L}\cdot\text{L}^{-1}$                     |      |
|          |                                | <i>Flourensia retinophylla</i> PE | MIC = 1500 $\mu\text{L}\cdot\text{L}^{-1}$                     |      |
|          | Water (5–50%)                  | <i>Moringa oleifera</i> PE        | IR = 43.4–100%                                                 | [26] |
|          |                                | <i>M. oleifera</i> PE             | IR = 48.8–100%                                                 |      |
|          |                                | <i>M. oleifera</i> PE             | IR = 36–100%                                                   |      |
|          | Essential oil                  | <i>Piper auritum</i> EO           | MIC <sub>50</sub> = 6000–9000 $\mu\text{g}\cdot\text{mL}^{-1}$ | [27] |
|          | Water (25%)                    | <i>Acacia nilotica</i> PE         | IR = 82%                                                       | [28] |
|          |                                | <i>Achras zapota</i> PE           | IR = 34.8%                                                     |      |
|          |                                | <i>Datura stramonium</i> PE s     | IR = 67.5%                                                     |      |
|          |                                | <i>Emblica officinalis</i> PE     | IR = 79.5%                                                     |      |
|          |                                | <i>Eucalyptus globulis</i> PE     | IR = 59.3%                                                     |      |
|          |                                | <i>Lawsonia inermis</i> PE        | IR = 82.0%                                                     |      |
|          |                                | <i>Mimusops elengi</i> PE         | IR = 86.0%                                                     |      |
|          |                                | <i>Peltophorum pterocarpum</i> PE | IR = 53.3%                                                     |      |
|          |                                | <i>Polyanthia longifolia</i> PE   | IR = 36.3%                                                     |      |
|          |                                | <i>Prosopis juliflora</i> PE      | IR = 80.3%                                                     |      |
|          |                                | <i>P. granatum</i> PE             | IR = 73.8%                                                     |      |
|          |                                | <i>Syzygium cumini</i> PE         | IR = 69.5%                                                     |      |

| Pathogen               | Extraction Media                | Plant                                        | Efficacy                                         | Ref. |
|------------------------|---------------------------------|----------------------------------------------|--------------------------------------------------|------|
| <i>S. sclerotiorum</i> | Water                           | <i>Filipendula</i> spp. PE                   | IR = 95.9%                                       | [29] |
|                        |                                 | <i>A. sativum</i> PE                         | IR = 81.4%                                       |      |
|                        | Ethanolol                       | <i>Mentha spicata</i> PE                     | MIC = 5%                                         | [30] |
|                        | Water                           | <i>A. sativum</i> PE                         | MIC = 7000 $\mu\text{g}\cdot\text{mL}^{-1}$      | [31] |
|                        | Methanol/water                  | <i>A. maritima</i> PE                        | MIC = 375 $\mu\text{g}\cdot\text{mL}^{-1}$       | [19] |
|                        |                                 | COS- <i>A. maritima</i> PE                   | MIC = 250 $\mu\text{g}\cdot\text{mL}^{-1}$       |      |
|                        | CO <sub>2</sub> extraction      | <i>G. hederacea</i> var. <i>Longituba</i> PE | MIC $\geq$ 5000 $\mu\text{g}\cdot\text{mL}^{-1}$ | [10] |
|                        | Hexane                          | <i>C. nocturnum</i> PE                       | MIC = 1000 $\mu\text{g}\cdot\text{mL}^{-1}$      | [23] |
|                        | Chloroform                      |                                              | MIC = 500 $\mu\text{g}\cdot\text{mL}^{-1}$       |      |
|                        | Ethyl acetate                   |                                              | MIC = 250 $\mu\text{g}\cdot\text{mL}^{-1}$       |      |
|                        | Methanol                        |                                              | MIC = 500 $\mu\text{g}\cdot\text{mL}^{-1}$       |      |
|                        | Essential oils (1, 2.5, and 5%) | <i>Thymus vulgaris</i> EO                    | n.a.                                             | [32] |
|                        |                                 | <i>Nigella sativa</i> EO                     | n.a.                                             |      |
|                        |                                 | <i>Origanum majorana</i> EO                  | MIC = 2.5%                                       |      |
|                        |                                 | <i>Syzygium aromaticum</i> EO                | MIC = 2.5%                                       |      |
|                        | Essential oils (20%)            | <i>Salvia rosmarinus</i> EO                  | n.a.                                             | [33] |
|                        |                                 | <i>Ocimum basilicum</i> EO                   | IR = 4.1%                                        |      |
|                        |                                 | <i>A. sativum</i> EO                         | IR = 28.2%                                       |      |
|                        |                                 | <i>Cymbopogon citratus</i> EO                | IR = 9.1%                                        |      |
|                        |                                 | <i>Nerium oleander</i> EO                    | IR = 14.1%                                       |      |
|                        |                                 | <i>A. indica</i> EO                          | IR = 35.5%                                       |      |
|                        |                                 | <i>Allium cepa</i> EO                        | IR = 16.9%                                       |      |
|                        | Essential oil                   | <i>Z. officinale</i> EO                      | MIC = 1000 $\mu\text{g}\cdot\text{mL}^{-1}$      | [34] |
|                        | Water                           | <i>Trachystemon orientalis</i> PE            | MIC = 7%                                         | [35] |
|                        |                                 | <i>T. orientalis</i> PE                      | MIC = 1%                                         |      |
|                        | Crude extracts                  | <i>Rosmarinus officinalis</i> PE             | MIC = 10%                                        | [36] |
|                        |                                 | <i>Salvia fruticosa</i> PE                   | MIC = 20%                                        |      |
|                        | Ethanol                         | <i>M. spicata</i> PE                         | MIC = 5%                                         | [30] |
|                        | Water                           | <i>A. sativum</i> PE                         | MIC = 5000 $\mu\text{g}\cdot\text{mL}^{-1}$      | [31] |

PE: plant extract; EO: essential oil; MIC: minimum inhibitory concentration; IZ: inhibition zone; IR: inhibition rate; MIC<sub>50</sub>: minimum inhibitory concentration that inhibited 50% of the radial growth; n.a.: no activity at the highest concentration tested.

**Table S2.** Minimum inhibitory concentrations (expressed in  $\mu\text{g}\cdot\text{mL}^{-1}$ ) of conventional antibiotics (for clinical use) against *P. cichorii* strain CITA Pci-5.

| Bacteria           | Penicillin | Ampicillin | Gentamicin | Ciprofloxacin | Tetracycline | Ref. |
|--------------------|------------|------------|------------|---------------|--------------|------|
| <i>P. cichorii</i> | $\geq 32$  | $\geq 256$ | 3          | 6             | 24           | [1]  |

## References (reference numbers do not match those that appear in the main text)

1. Sánchez-Hernández, E.; González-García, V.; Palacio-Bielsa, A.; Lorenzo-Vidal, B.; Buzón-Durán, L.; Martín-Gil, J.; Martín-Ramos, P. Antibacterial activity of *Ginkgo biloba* extracts against *Clavibacter michiganensis* subsp. *michiganensis*, *Pseudomonas* spp., and *Xanthomonas vesicatoria*. *Horticulturae* **2023**, *9*, 461, doi:10.3390/horticulturae9040461.
2. Behiry, S.I.; Okla, M.K.; Alamri, S.A.; El-Hefny, M.; Salem, M.Z.M.; Alaraidh, I.A.; Ali, H.M.; Al-Ghtani, S.M.; Monroy, J.C.; Salem, A.Z.M. Antifungal and antibacterial activities of wood treated with *Musa paradisiaca* L. peel extract: HPLC analysis of phenolic and flavonoid contents. *Processes* **2019**, *7*, 215, doi:10.3390/pr7040215.
3. El-Hefny, M.; Salem, M.Z.M.; Behiry, S.I.; Ali, H.M. The potential antibacterial and antifungal activities of wood treated with *Withania somnifera* fruit extract, and the phenolic, caffeine, and flavonoid composition of the extract according to HPLC. *Processes* **2020**, *8*, 113, doi:10.3390/pr8010113.
4. Delisle-Houde, M.; Tweddell, R.J.; Beres, B. Sugar maple autumn-shed leaf extract: a potential antibacterial agent for the management of lettuce bacterial leaf spot (*Xanthomonas campestris* pv. *vitians*) and varnish spot (*Pseudomonas cichorii*). *Canadian Journal of Plant Science* **2020**, *100*, 78-85, doi:10.1139/cjps-2019-0040.
5. Ramírez-Reyes, T.I.; Aguilar-Colorado, Á.S.; Murrieta-León, D.L.; Licona-Velázquez, L.S.; Bonilla-Landa, I.; Durán-Espinosa, C.; Avendaño-Reyes, S.; Monribot-Villanueva, J.L.; Guerrero-Analco, J.A. Identification of antibacterial phenolics in selected plant species from Mexican cloud forest by mass spectrometry dereplication. *Chemistry & Biodiversity* **2019**, *16*, e1800603, doi:10.1002/cbdv.201800603.
6. Buzón-Durán, L.; Sánchez-Hernández, E.; Martín-Ramos, P.; Navas-Gracia, L.M.; García-González, M.C.; Oliveira, R.; Martín-Gil, J. *Silene uniflora* extracts for strawberry postharvest protection. *Plants* **2023**, *12*, 1846, doi:10.3390/plants12091846.
7. Sánchez-Hernández, E.; Martín-Ramos, P.; Martín-Gil, J.; Santiago-Aliste, A.; Hernández-Navarro, S.; Oliveira, R.; González-García, V. Bark extract of *Uncaria tomentosa* L. for the control of strawberry phytopathogens. *Horticulturae* **2022**, *8*, 672, doi:10.3390/horticulturae8080672.
8. Boiteux, J.; Espino, M.; de los Ángeles Fernández, M.; Pizzuolo, P.; Silva, M.F. Eco-friendly postharvest protection: *Larrea cuneifolia*-NADES extract against *Botrytis cinerea*. *Revista de la Facultad de Ciencias Agrarias Uncuyo* **2019**, *51*, 427-437.
9. Yusoff, S.F.; Haron, F.F.; Tengku Muda Mohamed, M.; Asib, N.; Sakimin, S.Z.; Abu Kassim, F.; Ismail, S.I. Antifungal activity and phytochemical screening of *Vernonia amygdalina* extract against *Botrytis cinerea* causing gray mold disease on tomato fruits. *Biology* **2020**, *9*, 286.
10. Gwiazdowska, D.; Uwineza, P.A.; Frąk, S.; Juś, K.; Marchwińska, K.; Gwiazdowski, R.; Waśkiewicz, A. Antioxidant, antimicrobial and antibiofilm properties of *Glechoma hederacea* extracts obtained by supercritical fluid extraction, using different extraction conditions. *Appl. Sci.* **2022**, *12*, 3572.
11. Šernaitė, L.; Rasiukevičiūtė, N.; Valiūskaitė, A. Application of plant extracts to control postharvest gray mold and susceptibility of apple fruits to *B. cinerea* from different plant hosts. *Foods* **2020**, *9*, 1430, doi:10.3390/foods9101430.
12. Šernaitė, L.; Rasiukevičiūtė, N.; Dambrauskienė, E.; Viškelis, P.; Valiūskaitė, A. Biocontrol of strawberry pathogen *Botrytis cinerea* using plant extracts and essential oils. *Zemdirbyste-Agriculture* **2020**, *107*, 147-152, doi:10.13080/z-a.2020.107.019.
13. Righini, H.; Baraldi, E.; García Fernández, Y.; Martel Quintana, A.; Roberti, R. Different antifungal activity of *Anabaena* sp., *Ecklonia* sp., and *Jania* sp. against *Botrytis cinerea*. *Marine Drugs* **2019**, *17*, 299, doi:10.3390/md17050299.
14. Şesan, T.E.; Enache, E.; Iacomì, B.M.; Oprea, M.; Oancea, F.; Iacomì, C. Antifungal activity of some plant extracts against *Botrytis cinerea* Pers. in the blackcurrant crop (*Ribes nigrum* L.). *Acta Sci. Pol., Hortorum Cultus* **2015**, *14*, 29-43.
15. Abou-Jawdah, Y.; Wardan, R.; Sobh, H.; Salameh, A. Antifungal activities of extracts from selected lebanese wild plants against plant pathogenic fungi. *Phytopathologia Mediterranea* **2004**, *43*, 377-386, doi:10.14601/Phytopathol\_Mediterr-1761.



16. Salamone, A.; Zizzo, G.V.; Scarito, G. The antimicrobial activity of water extracts from Labiatae. *Acta Hortic.* **2006**, 10.17660/ActaHortic.2006.723.67, 465-470, doi:10.17660/ActaHortic.2006.723.67.
17. Minova, S.; Sešķēna, R.; Voitkāne, S.; Metla, Z.; Daugavietis, M.; Jankevica, L. Impact of pine (*Pinus sylvestris* L.) and spruce (*Picea abies* (L.) Karst.) bark extracts on important strawberry pathogens. *Proceedings of the Latvian Academy of Sciences. Section B. Natural, Exact, and Applied Sciences.* **2015**, 69, 62-67, doi:10.1515/prolas-2015-0008.
18. Onaran, A.; Bayan, Y. Antifungal activity of *Liquidambar orientalis* L., and *Myrtus communis* L. against some plant pathogenic fungi. *Scientific Papers. Series A. Agronomy* **2016**, 59, 360-364.
19. Sánchez-Hernández, E.; Martín-Ramos, P.; Navas Gracia, L.M.; Martín-Gil, J.; Garcés-Claver, A.; Flores-León, A.; González-García, V. *Armeria maritima* (Mill.) Willd. flower hydromethanolic extract for cucurbitaceae fungal diseases control. *Molecules* **2023**, 28, 3730, doi:10.3390/molecules28093730.
20. Méndez-Chávez, M.; Ledesma-Escobar, C.A.; Hidalgo-Morales, M.; Rodríguez-Jimenes, G.d.C.; Robles-Olvera, V.J. Antifungal activity screening of fractions from *Annona cherimola* Mill. leaf extract against *Fusarium oxysporum*. *Arch. Microbiol.* **2022**, 204, 330, doi:10.1007/s00203-022-02944-4.
21. Cherkupally, R.; Kota, S.R.; Amballa, H.; Reddy, B.N. In vitro antifungal potential of plant extracts against *Fusarium oxysporum*, *Rhizoctonia solani* and *Macrophomina phaseolina*. *Annals of Plant Sciences* **2017**, 6, 1676, doi:10.21746/aps.2017.9.2.
22. Rongai, D.; Pulcini, P.; Pesce, B.; Milano, F. Antifungal activity of pomegranate peel extract against fusarium wilt of tomato. *Eur. J. Plant Pathol.* **2016**, 147, 229-238, doi:10.1007/s10658-016-0994-7.
23. Al-Reza, S.M.; Rahman, A.; Ahmed, Y.; Kang, S.C. Inhibition of plant pathogens in vitro and in vivo with essential oil and organic extracts of *Cestrum nocturnum* L. *Pestic. Biochem. Physiol.* **2010**, 96, 86-92, doi:10.1016/j.pestbp.2009.09.005.
24. Chakma, M.; Bashir, M.A. In vitro control of *Fusarium solani* and *F. oxysporum* the causative agent of brinjal wilt. *Dhaka University Journal of Biological Sciences* **2014**, 23, 53-60, doi:10.3329/dujbs.v23i1.19826.
25. Jasso de Rodríguez, D.; Hernández-Castillo, D.; Angulo-Sánchez, J.L.; Rodríguez-García, R.; Villarreal Quintanilla, J.A.; Lira-Saldivar, R.H. Antifungal activity in vitro of *Flourensia* spp. extracts on *Alternaria* sp., *Rhizoctonia solani*, and *Fusarium oxysporum*. *Ind. Crops Prod.* **2007**, 25, 111-116, doi:10.1016/j.indcrop.2006.08.007.
26. El-Mohamedy, R.S.R.; Abdalla, A.M. Evaluation of antifungal activity of *Moringa oleifera* extracts as natural fungicide against some plant pathogenic fungi in-vitro. *International Journal of Agricultural Technology* **2014**, 10, 963-982.
27. Chacón, C.; Bojórquez-Quintal, E.; Caamal-Chan, G.; Ruiz-Valdiviezo, V.M.; Montes-Molina, J.A.; Garrido-Ramírez, E.R.; Rojas-Abarca, L.M.; Ruiz-Lau, N. In vitro antifungal activity and chemical composition of *Piper auritum* Kunth essential oil against *Fusarium oxysporum* and *Fusarium equiseti*. *Agronomy* **2021**, 11, 1098, doi:10.3390/agronomy11061098.
28. Satish, S.; Raghavendra, M.P.; Raveesha, K.A. Antifungal potentiality of some plant extracts against *Fusarium* sp. *Archives of Phytopathology and Plant Protection* **2009**, 42, 618-625, doi:10.1080/03235400701287578.
29. Nelson, D.; Beattie, K.; McCollum, G.; Martin, T.; Sharma, S.; Rao, J.R. Performance of natural antagonists and commercial microbiocides towards in vitro suppression of flower bed soil-borne *Fusarium oxysporum*. *Advances in Microbiology* **2014**, 4, 151-159, doi:10.4236/aim.2014.43020.
30. Al-Araji, A.M.Y.; Hasan, A.M.; Fradi, A.J.; Majeed, S.M.A.; Majeed, W.W.A.; Naji, E.T. Study of alkaloids, phenols and terpenes of *Mentha spicata* as a fungicide against *Rhizoctonia solani*, *Sclerotinia sclerotiorum* and *Fusarium oxysporum*. *Int. J. Adv. Biol. Res.* **2017**, 7, 345-354.
31. Singh, U.P.; Pathak, K.K.; Khare, M.N.; Singh, R.B. Effect of leaf extract of garlic on *Fusarium oxysporum* f. sp. *ciceri*, *Sclerotinia sclerotiorum* and on gram seeds. *Mycologia* **2018**, 71, 556-564, doi:10.1080/00275514.1979.12021038.
32. Ahmed, G.; Elsis, A. Efficacy of compost and some essential oils alone or in combination in controlling cucumber white mould disease under protected house conditions *Journal of Plant Protection and Pathology* **2020**, 11, 291-297, doi:10.21608/jppp.2020.103284.
33. Elbatawy, Y.M.; Mohamed, F.G.; Eisa, N.A.; El-Habbak, M.H. Evaluation of some biological agents and plant extracts for controlling cucumber white rot caused by *Sclerotinia sclerotiorum* (Lib) de Bary. *Annals of Agricultural Science, Moshtohor* **2020**, 58, 351-364, doi:10.21608/assjm.2020.114901.

34. Hussein, K.A. Antifungal activity and chemical composition of ginger essential oil against ginseng pathogenic fungi. *Current Research in Environmental & Applied Mycology* **2018**, 8, 194-203, doi:10.5943/cream/8/2/4.
35. Onaran, A.; Yılar, M. Antifungal and herbicidal activity of *Trachystemon orientalis* (L.) G. Don against some plant pathogenic fungi and *Cuscuta campestris* Yunck. *Iğdır Univ. J. Inst. Sci. & Tech.* **2018**, 8, 37-43.
36. Goussous, S.J.; Mas'ad, I.S.; Abu El-Samen, F.M.; Tahhan, R.A. In vitro inhibitory effects of rosemary and sage extracts on mycelial growth and sclerotial formation and germination of *Sclerotinia sclerotiorum*. *Archives of Phytopathology and Plant Protection* **2013**, 46, 890-902, doi:10.1080/03235408.2012.753708.
